# Supplementary material for: One-Tip enables comprehensive proteome coverage in minimal cells and single zygotes
Source: PubMed Central journal article supplement (PMC10951212; doi:10.1038/s41467-024-46777-9), 2024-03-20
Supplement: 41467_2024_46777_MOESM1_ESM.pdf [file 41467_2024_46777_MOESM1_ESM.pdf]

a

Method evaluation On

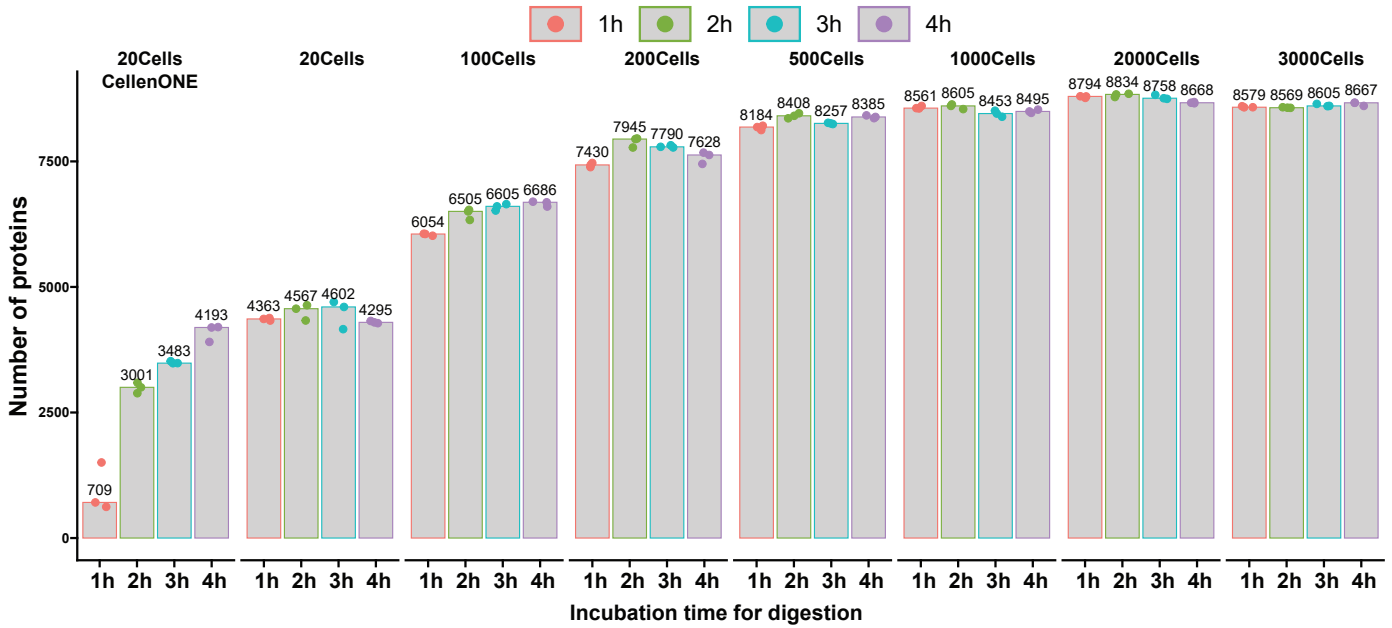

b

Method evaluation Off

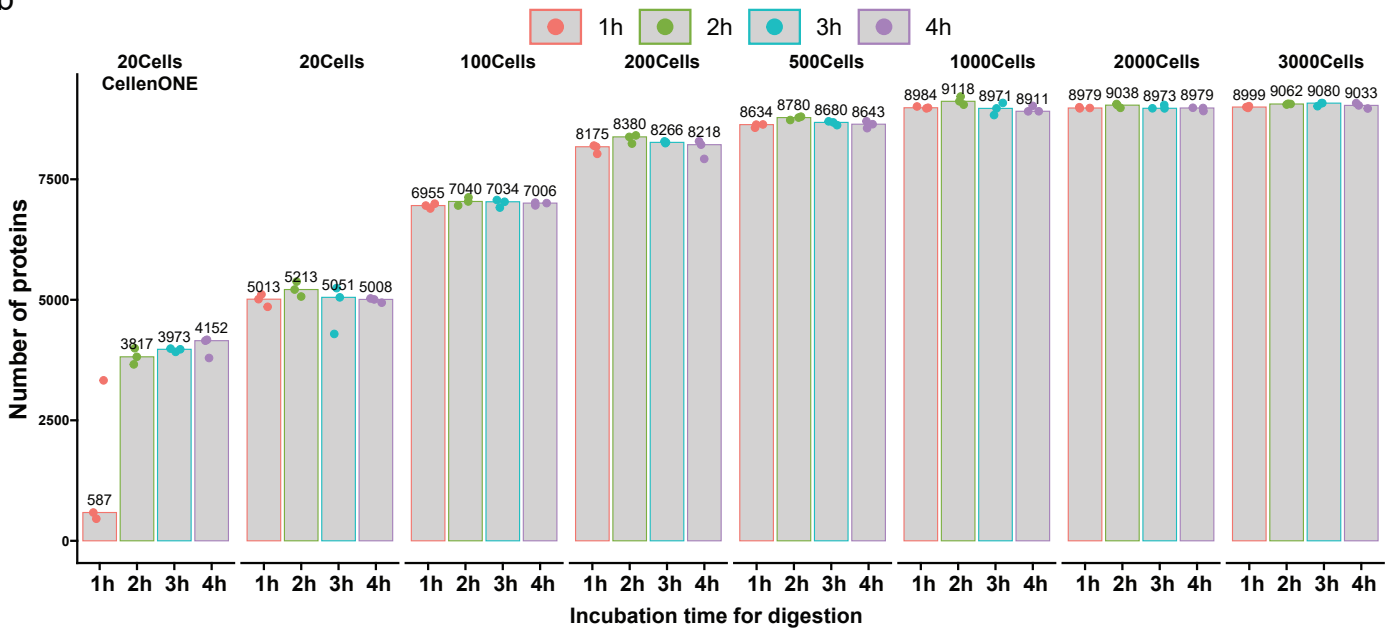

**Supplementary Figure 1** | Identification count of proteins across varying cell quantities using the One-Tip method. **(a)** With the 'Method Evaluation' option in Spectronaut enabled. **(b)** With the 'Method Evaluation' option in Spectronaut disabled. All samples underwent digestion times ranging from 1 to 4 hours. N=3 samples for each condition. Source data are provided as a Source Data file.

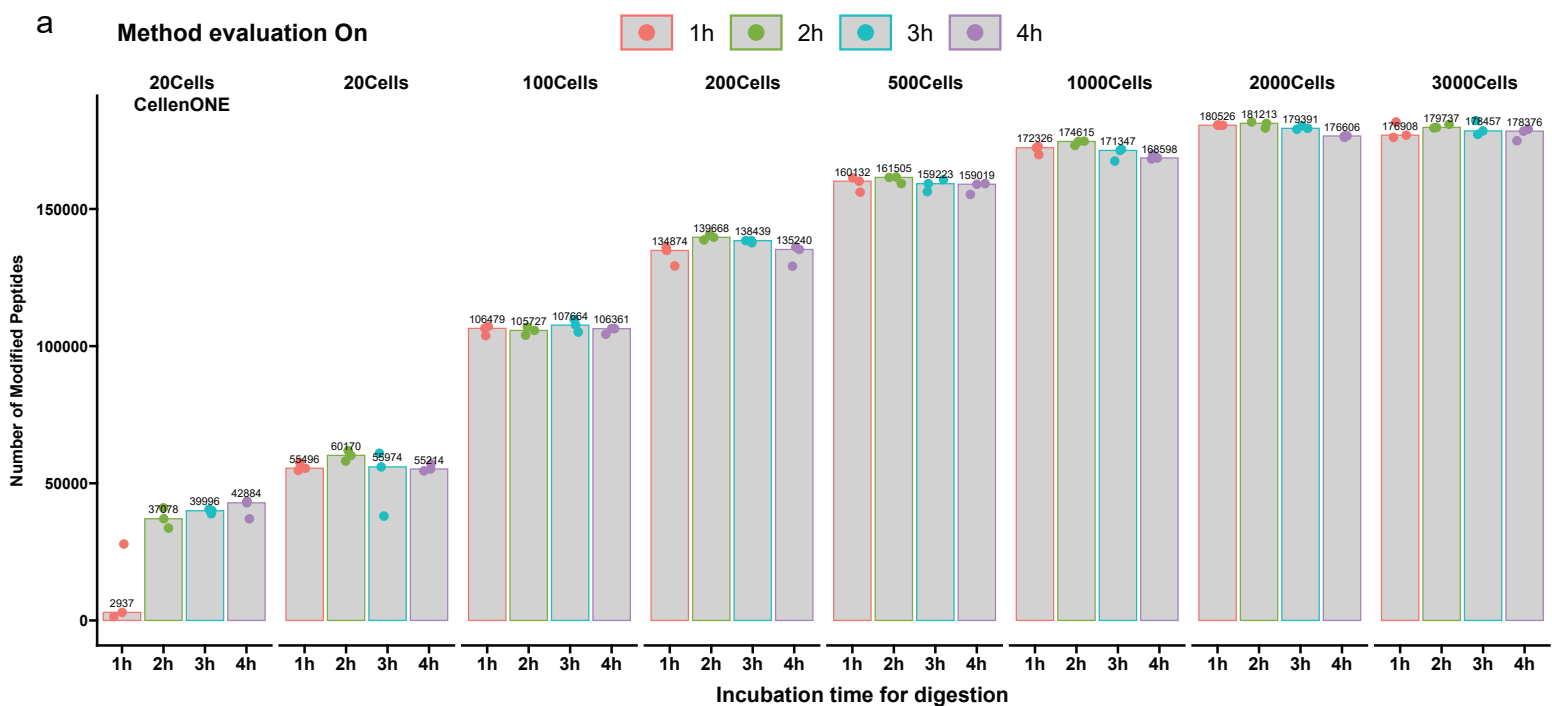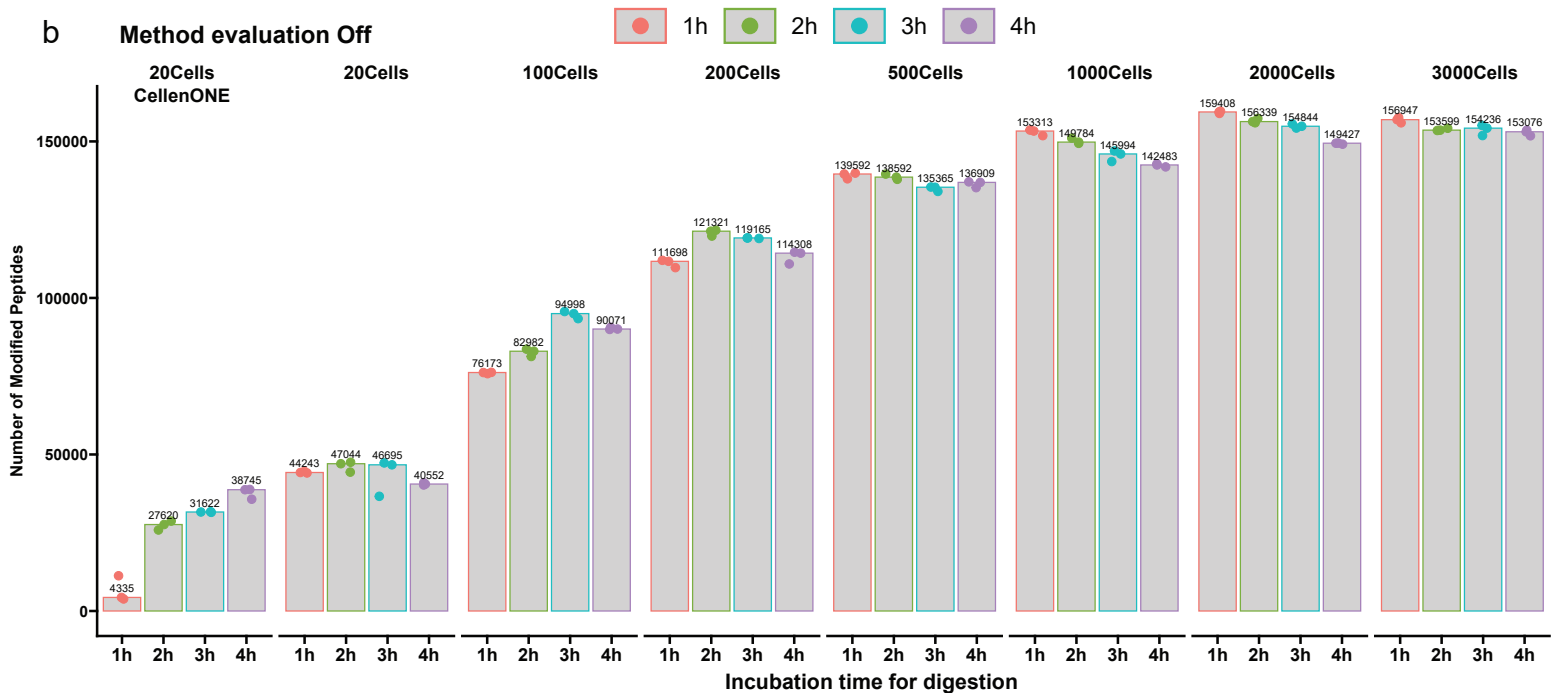

**Supplementary Figure 2** | Identification count of peptides across varying cell quantities using the One-Tip method. **(a)** With the 'Method Evaluation' option in Spectronaut enabled. **(b)** With the 'Method Evaluation' option in Spectronaut disabled. All samples underwent digestion times ranging from 1 to 4 hours. N= 3 samples for each condition. Source data are provided as a Source Data file.

Method evaluation On

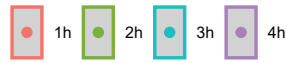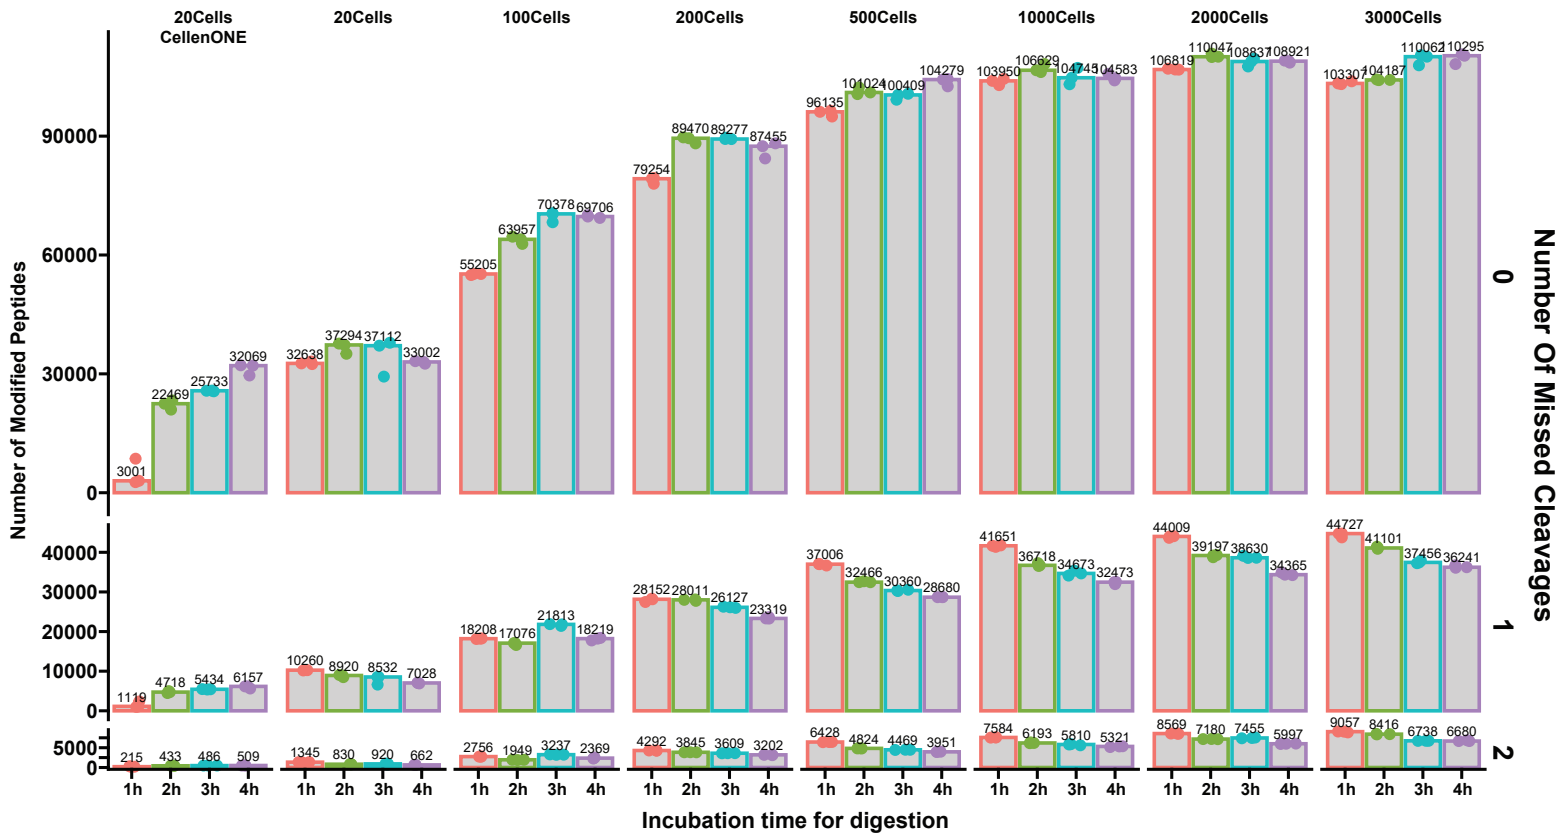

**Supplementary Figure 3** | Count of peptides with differing numbers of missed cleavages, analyzed with the 'Method Evaluation' option in Spectronaut enabled. The digestion duration varied from 1 to 4 hours. N=3 samples for each condition. Source data are provided as a Source Data file.

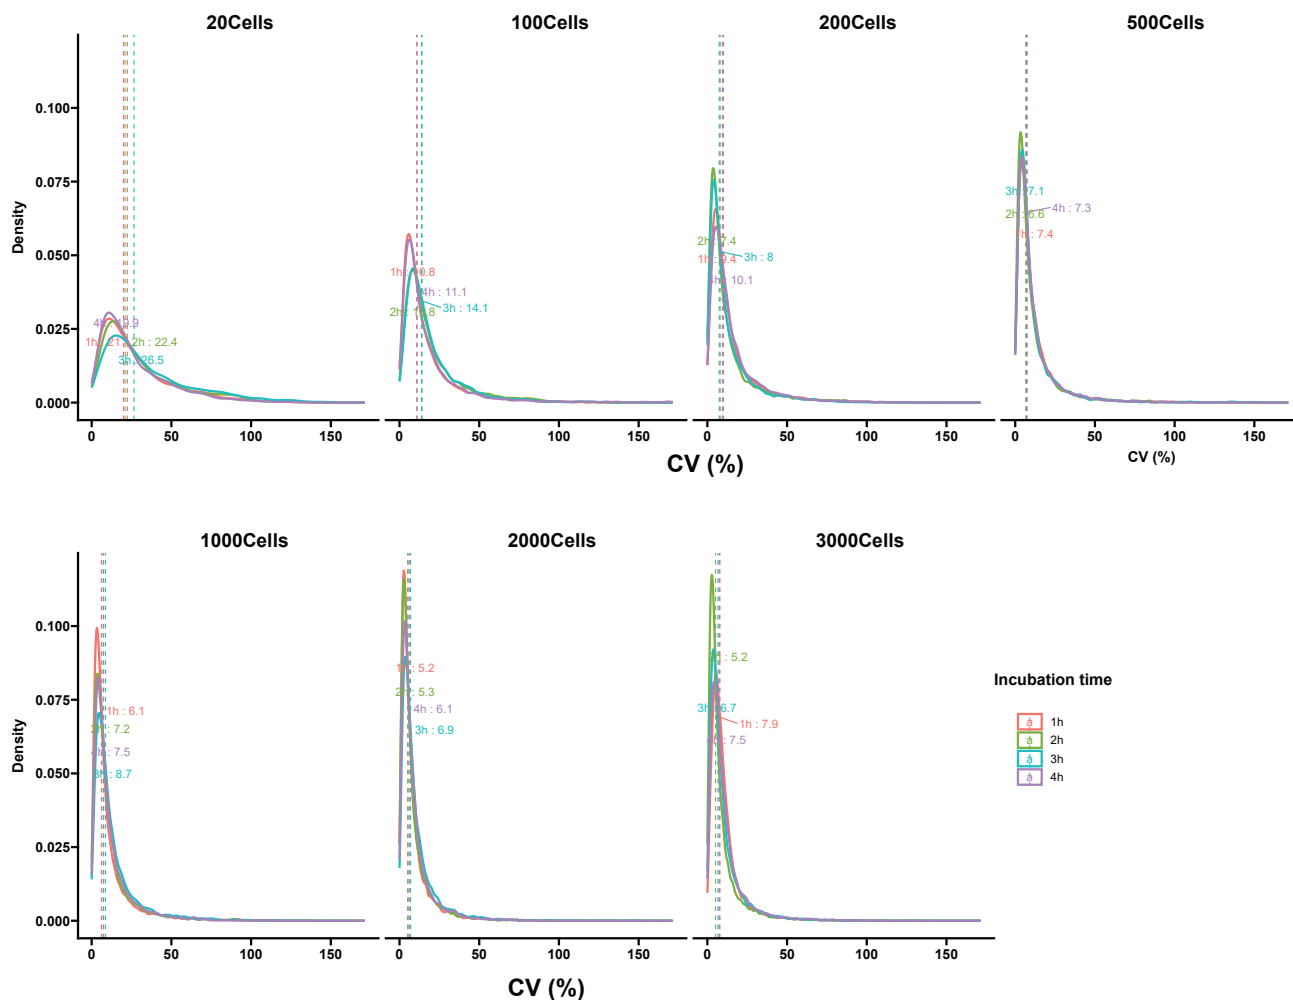

**Supplementary Figure 4** | Distribution of coefficients of variation (CV) across different cell quantities processed via the One-Tip method. Digestion periods spanned 1 to 4 hours, and median CV values are annotated. Source data are provided as a Source Data file.

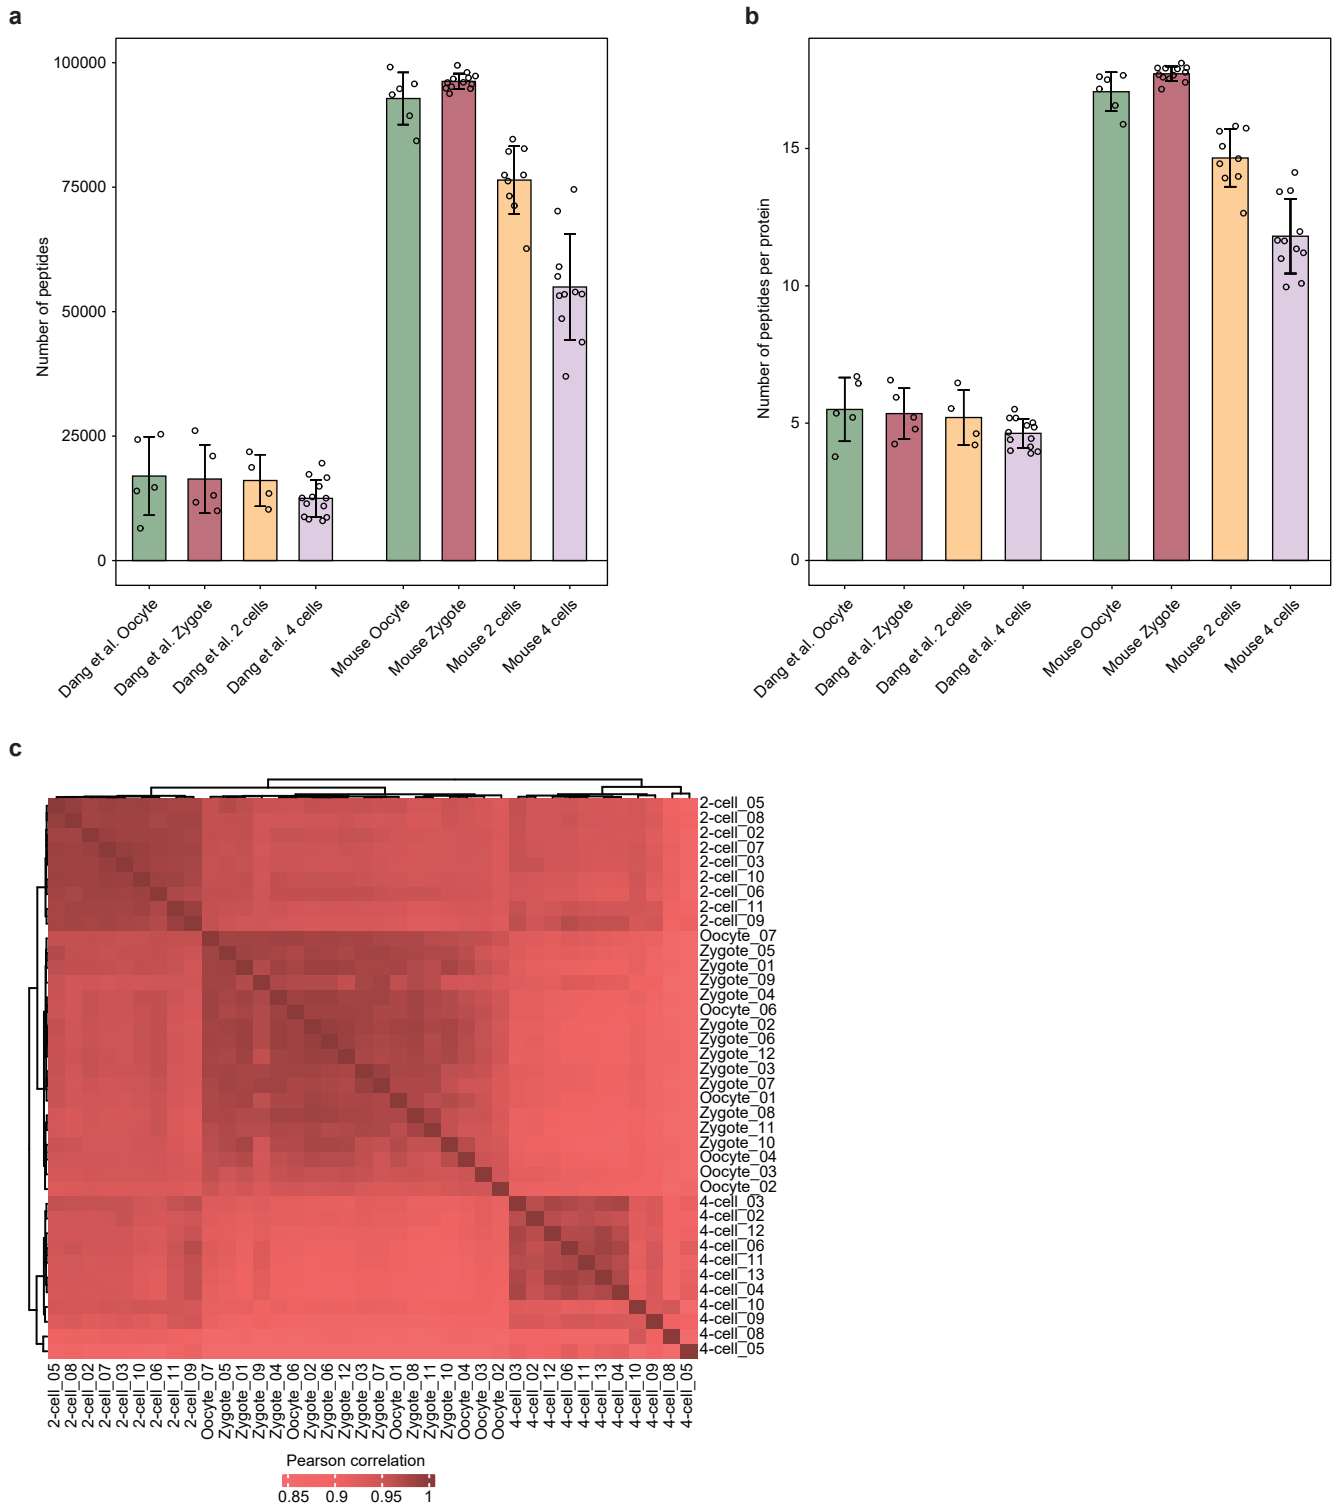

**Supplementary Figure 5 | Number of peptides, correlation of protein intensities between samples and summed protein intensities.** (a) Number of peptides per sample in Dang et al. study and our study. (b) Same with the number of peptides per protein. Error bars represent  $\pm$  the standard deviation of the mean. (c) Unsupervised hierarchical clustering using canberra and ward.D2 methods of the Pearson correlation of normalized protein abundances between each sample. Number of biological replicates: n=6 for oocyte, n=12 for zygote, n=9 for 2-cell stage and n=11 for 4-cell stage. Source data are provided as a Source Data file.
